# Supplementary material for: TBC1D2 Promotes Ovarian Cancer Metastasis via Inducing E-Cadherin Degradation
Source: Front Oncol. 2022 Apr 27;12:766077. doi: 10.3389/fonc.2022.766077 (PMC9091366; doi:10.3389/fonc.2022.766077)
Supplement: Supplementary file 2 [file Table_1.xlsx]

## Sheet: Supplementary Table 1 
Supplementary Table 1. Distribution of patients’ characteristics.
Variable	All patients, n=100
Age
<60	42
≥60	58
FIGO stage
II	41
III	40
IV	19
Grade
G1(Well Differentiated)	19
G2(Moderately differentiated)	36
G3(Poorly differentiated)	45
Histological type
Serous Cystadenocarcinoma	73
Endometrioid tumor	11
Clear cell carcinoma	9
Mucinous Cystadenocarcinoma	7
Metastasis
YES	59
NO	41
Status
Alive	57
Dead	43

## Sheet: Supplementary Table 2
Supplementary Table 2. Distribution of TCGA-OV patients’ characteristics.
Variable	All patients, n=374
Age
<60	178
≥60	196
Race
White	326
Asian	11
Other	28
Stage
I	1
II	22
III	291
IV	57
Grade
G1(Well Differentiated)	1
G2(Moderately differentiated)	42
G3(Poorly differentiated)	320
G4(Undifferentiated)	1
GX(Grade cannot be assessed)	8
Tumor size
>20mm	70
1-20mm	197
No Macroscopic disease	66
Lymphatic invasion
YES	100
NO	48
Venous invasion
YES	63
NO	40
Person neoplasm cancer status
With tumor	246
Tumor free	85

## Sheet: Supplementary Table 3
Supplementary Table 3. Information of public datasets
GEO accession	Platforms	Sample	PMID	URL
GSE66957	GPL15048	57 ovarian carcinomas and 12 ovarian normal samples.	-	https://www.ncbi.nlm.nih.gov/geo/query/acc.cgi?acc=GSE66957
GSE12470	GPL887	43 serous ovarian cancer samples, 10 normal peritoneum samples.	19710407	https://www.ncbi.nlm.nih.gov/geo/query/acc.cgi?acc=GSE12470
GSE40595	GPL570	31 laser microdissected cancer associated stroma samples, 32 epithelial tumor samples from HGSOC patients, 8 microdissected normal ovarian stroma samples and 6 ovarian surface epthelium (HOSE) samples.	23824740	https://www.ncbi.nlm.nih.gov/geo/query/acc.cgi?acc=GSE40595

## Sheet: Supplementary Table 4
Supplementary Table 4. Sequences of primers and siRNAs.
Primer name	Sequences
1. Primers for real-time PCR:
TBC1D2 forward primer:	TGTGCCCTGTGAAAACACCC
reverse primer:	GCCACGGATGTTGTGCATTG
GAPDH forward primer:	GTCTCCTCTGACTTCAACAGCG
reverse primer:	ACCACCCTGTTGCTGTAGCCAA
ADAM8 forward primer:	GAGGGTGAGCTACGTCCTTG
reverse primer:	CAGCCGTATAGGTCTCTGTGT
ARG1 forward primer:	GTGGAAACTTGCATGGACAAC
reverse primer:	AATCCTGGCACATCGGGAATC
AZU1 forward primer:	ATGCCCGCTTCGTGATGAC
reverse primer:	CTGATGGAAAACGTCTGGCG
CD36 forward primer:	GGCTGTGACCGGAACTGTG
reverse primer:	AGGTCTCCAACTGGCATTAGAA
CD47 forward primer:	AGAAGGTGAAACGATCATCGAGC
reverse primer:	CTCATCCATACCACCGGATCT
CEACAM1 forward primer:	TGCTCTGATAGCAGTAGCCCT
reverse primer:	TGCCGGTCTTCCCGAAATG
ELANE forward primer:	CTCGCGTGTCTTTTCCTCG
reverse primer:	GCCGACATGACGAAGTTGG
HMGB1 forward primer:	TATGGCAAAAGCGGACAAGG
reverse primer:	CTTCGCAACATCACCAATGGA
IQGAP1 forward primer:	AGAACGTGGCTTATGAGTACCT
reverse primer:	CCAGTCGCCTTGTATCTGGT
ITGAV forward primer:	ATCTGTGAGGTCGAAACAGGA
reverse primer:	TGGAGCATACTCAACAGTCTTTG
LILRB2 forward primer:	GCATCTTGGATTACACGGATACG
reverse primer:	CTGACAGCCATATCGCCCTG
MAPK14 forward primer:	CCCGAGCGTTACCAGAACC
reverse primer:	TCGCATGAATGATGGACTGAAAT
NCKAP1L forward primer:	GGACCAGTACATCGTGAAAAAGC
reverse primer:	TGATCCCGAAATTCCATGACATC
PTAFR forward primer:	ATGGAGCCACATGACTCCTC
reverse primer:	AATGACCCCGAGCACAAAGAT
PTPN6 forward primer:	GGTGTCCACGGTAGCTTCC
reverse primer:	ACAGGTCATAGAAATCCCCTGAG
PTPRC forward primer:	GTTTTCGCTACATGACTGCACA
reverse primer:	AGGTTGTCCAACTGACATCTTTC
PTPRJ forward primer:	GGCACCCCTAGTCCAATTCC
reverse primer:	TCCCATTAGATCCTTGTTCAGGT
PYCARD forward primer:	TGGATGCTCTGTACGGGAAG
reverse primer:	CCAGGCTGGTGTGAAACTGAA
RAC1 forward primer:	ATGTCCGTGCAAAGTGGTATC
reverse primer:	CTCGGATCGCTTCGTCAAACA
SIRPA forward primer:	GGCCTCAACCGTTACAGAGAA
reverse primer:	GTTCCGTTCATTAGATCCAGTGT
miR-17-5p RT primer:	CTCAACTGGTGTCGTGGAGTCGGCAATTCAGTTGAGCCTACCTGC
forward primer:	TCGGCAGGGTTTCACGAATGTC
reverse primer:	GGTGTCGTGGAGTCGGCAATTC
miR-373-3p RT primer:	CTCAACTGGTGTCGTGGAGTCGGCAATTCAGTTGAGCACACCCCA
forward primer:	TCGGCAGGCTTCACGAAGCTAA
reverse primer:	GGTGTCGTGGAGTCGGCAATTC
2. Primers for gene cloning
TBC1D2 forward primer:	CGCGGATCCGAAGAAGTGGAGGAGCTGGAGCTG
reverse primer:	CCG GAATTC ACTGGTCCGTGCCTGACCTCCAGTG
3. shRNA
TBC1D2 shRNA	5’-CACCGCAGATGAAGCGCTGGGAATTTTCAAGAGAAATTCCCAGCGCTTCATCTGCTTTTTTG-3’
Control shRNA	5’-CACCGTTCTCCGAACGTGTCACGTTTCAAGAGAACGTGACACGTTCGGAGAATTTTTTGG-3’
4. siRNAs
TBC1D2 siRNA1 sense:	5’-GCACCUGGGGACUGAAAUA-3’
TBC1D2 siRNA 2 sense:	5’-CAACAAACACUUCACCUGC-3’
Rac1 siRNA sense:	5’-AGACGGAGCTGTAGGTAAA-3’
IQGAP1 siRNA sense:	5’-UGAAGCUAUUGACCGUAGA-3’
Control siRNA sense:	5’-UUCUCCGAACGUGUCACGUTT-3’
5. miRNA mimic and inhibitor
miR-373-3p negative control sense:	UUCUCCGAACGUGUCACGUTT
Antisense:	ACGUGACACGUUCGGAGAATT
miR-373-3p mimics sense:	GAAGUGCUUCGAUUUUGGGGUGU
Antisense:	ACCCCAAAAUCGAAGCACUUCUU
miR-373-3p inhibitor negative control:	CAGUACUUUUGUGUAGUACAA
miR-373-3p inhibitor:	ACACCCCAAAAUCGAAGCACUUC
6. Primers for TBC1D2 3'UTR cloning
WT 3'UTR forward primer:	5′- ATTTGCTAGCCTTGGCCACCTCCCCTCCCC -3
reverse primer:	5′-ACGTGTCGAC TTTAAGTTCCAAAGCTTATG -3′
MUT 3'UTR forward primer:	5'-gctcttgcttgtttacatgccaatcacgtctgtggaagaggtgacgaaagg-3'
reverse primer:	5'-cctttcgtcacctcttccacagacgtgattggcatgtaaacaagcaagagc-3'

## Sheet: Supplementary Table 5
Supplementary Table 5.Group for function enrichment analysis
ID	TBC1D2	GROUP
TCGA-59-2348-01A	48.2506	HIGH
TCGA-29-1690-01A	36.0027	HIGH
TCGA-24-1546-01A	32.4133	HIGH
TCGA-09-1662-01A	28.2439	HIGH
TCGA-59-2354-01A	28.1846	HIGH
TCGA-23-1030-01A	26.9742	HIGH
TCGA-29-1705-01A	26.0258	HIGH
TCGA-29-1694-01A	25.6163	HIGH
TCGA-31-1951-01A	23.9445	HIGH
TCGA-36-1568-01A	22.9098	HIGH
TCGA-24-1103-01A	22.3957	HIGH
TCGA-24-2271-01A	21.7703	HIGH
TCGA-23-1027-01A	21.5913	HIGH
TCGA-29-1776-01A	21.0614	HIGH
TCGA-61-1724-01A	21.0519	HIGH
TCGA-29-1711-01A	20.6733	HIGH
TCGA-57-1582-01A	20.4878	HIGH
TCGA-61-2088-01A	18.9639	HIGH
TCGA-24-1423-01A	18.4005	HIGH
TCGA-25-2404-01A	18.3047	HIGH
TCGA-04-1536-01A	18.0805	HIGH
TCGA-23-1118-01A	17.5284	HIGH
TCGA-25-1328-01A	17.4611	HIGH
TCGA-09-2045-01A	17.2448	HIGH
TCGA-04-1362-01A	17.1498	HIGH
TCGA-13-1485-01A	16.9061	HIGH
TCGA-24-1467-01A	16.5928	HIGH
TCGA-25-2409-01A	16.2313	HIGH
TCGA-13-0886-01A	16.1215	HIGH
TCGA-13-1405-01A	15.5187	HIGH
TCGA-24-1844-01A	15.469	HIGH
TCGA-29-1785-01A	15.316	HIGH
TCGA-VG-A8LO-01A	15.1643	HIGH
TCGA-61-2101-01A	15.1232	HIGH
TCGA-09-1668-01B	14.8664	HIGH
TCGA-57-1993-01A	14.1273	HIGH
TCGA-13-0897-01A	13.8003	HIGH
TCGA-30-1862-01A	13.5846	HIGH
TCGA-24-1847-01A	13.4139	HIGH
TCGA-59-2351-01A	13.3917	HIGH
TCGA-25-1329-01A	13.3176	HIGH
TCGA-24-2262-01A	12.8512	HIGH
TCGA-61-1911-01A	12.514	HIGH
TCGA-24-1558-01A	12.2162	HIGH
TCGA-13-0762-01A	12.1358	HIGH
TCGA-31-1959-01A	12.1062	HIGH
TCGA-25-1321-01A	12.1004	HIGH
TCGA-29-1693-01A	12.08	HIGH
TCGA-13-0765-01A	12.0777	HIGH
TCGA-25-1318-01A	11.8326	HIGH
TCGA-20-0987-01A	11.7932	HIGH
TCGA-24-1842-01A	11.725	HIGH
TCGA-24-1430-01A	11.6635	HIGH
TCGA-24-1552-01A	11.5323	HIGH
TCGA-59-2350-01A	11.455	HIGH
TCGA-25-1322-01A	11.2974	HIGH
TCGA-13-1409-01A	11.2789	HIGH
TCGA-61-1918-01A	11.0458	HIGH
TCGA-61-2104-01A	10.7953	HIGH
TCGA-61-1737-01A	10.7707	HIGH
TCGA-24-1416-01A	10.7231	HIGH
TCGA-24-0970-01B	10.6473	HIGH
TCGA-24-2254-01A	10.475	HIGH
TCGA-23-2084-01A	10.2427	HIGH
TCGA-25-1319-01A	10.2424	HIGH
TCGA-57-1586-01A	10.2355	HIGH
TCGA-24-2298-01A	10.1743	HIGH
TCGA-24-2281-01A	10.1405	HIGH
TCGA-23-1120-01A	10.0043	HIGH
TCGA-13-0908-01B	9.90621	HIGH
TCGA-24-1549-01A	9.86374	HIGH
TCGA-10-0937-01A	9.79672	HIGH
TCGA-13-1411-01A	9.78556	HIGH
TCGA-24-1930-01A	9.76632	HIGH
TCGA-25-2042-01A	9.72749	HIGH
TCGA-31-1953-01A	9.68241	HIGH
TCGA-57-1583-01A	9.65655	HIGH
TCGA-04-1648-01A	9.63582	HIGH
TCGA-30-1892-01A	9.63015	HIGH
TCGA-13-1511-01A	9.52366	HIGH
TCGA-04-1651-01A	9.47541	HIGH
TCGA-29-1770-01A	9.46227	HIGH
TCGA-25-1630-01A	9.37795	HIGH
TCGA-57-1584-01A	9.35628	HIGH
TCGA-29-1768-01A	9.32037	HIGH
TCGA-36-1571-01A	9.26114	HIGH
TCGA-25-1626-01A	9.16853	HIGH
TCGA-09-1670-01A	9.15163	HIGH
TCGA-13-1510-01A	9.10989	HIGH
TCGA-23-1026-01B	9.08061	HIGH
TCGA-04-1331-01A	9.02885	HIGH
TCGA-24-1553-01A	8.99727	HIGH
TCGA-20-1687-01A	8.97405	HIGH
TCGA-23-1024-01A	8.9674	HIGH
TCGA-61-2003-01A	8.93912	HIGH
TCGA-13-0883-01A	8.93583	HIGH
TCGA-59-2355-01A	8.82432	HIGH
TCGA-36-1574-01A	8.80428	HIGH
TCGA-09-0366-01A	8.77113	HIGH
TCGA-23-1029-01B	8.67418	HIGH
TCGA-24-1616-01A	8.65573	HIGH
TCGA-23-2078-01A	8.65472	HIGH
TCGA-61-1998-01A	8.6504	HIGH
TCGA-09-0367-01A	8.60853	HIGH
TCGA-23-1021-01B	8.5943	HIGH
TCGA-OY-A56Q-01A	8.44462	HIGH
TCGA-24-1560-01A	8.41402	HIGH
TCGA-13-0725-01A	8.4075	HIGH
TCGA-25-1635-01A	8.40214	HIGH
TCGA-29-2427-01A	8.37433	HIGH
TCGA-25-1623-01A	8.27195	HIGH
TCGA-61-1995-01A	8.2481	HIGH
TCGA-36-1570-01A	8.23597	HIGH
TCGA-13-0887-01A	8.21839	HIGH
TCGA-25-2401-01A	8.19116	HIGH
TCGA-24-1565-01A	8.14709	HIGH
TCGA-61-2008-01A	8.14574	HIGH
TCGA-25-1317-01A	8.04138	HIGH
TCGA-25-1631-01A	7.96689	HIGH
TCGA-24-1435-01A	7.82141	HIGH
TCGA-31-1946-01A	7.77692	HIGH
TCGA-29-2428-01A	7.7082	HIGH
TCGA-29-1783-01A	7.66642	HIGH
TCGA-20-0991-01A	7.65722	HIGH
TCGA-25-2398-01A	7.64074	HIGH
TCGA-24-2027-01A	7.5674	HIGH
TCGA-61-2109-01A	7.53334	HIGH
TCGA-36-1580-01A	7.48589	HIGH
TCGA-23-1809-01A	7.44454	HIGH
TCGA-61-2113-01A	7.41617	HIGH
TCGA-13-0726-01A	7.41597	HIGH
TCGA-24-2293-01A	7.2868	HIGH
TCGA-24-2038-01A	7.27133	HIGH
TCGA-30-1857-01A	7.20958	HIGH
TCGA-25-1326-01A	7.20571	HIGH
TCGA-24-1562-01A	7.17611	HIGH
TCGA-61-1725-01A	7.17316	HIGH
TCGA-29-1688-01A	7.14297	HIGH
TCGA-24-2024-01A	7.07254	HIGH
TCGA-61-2110-01A	7.05538	HIGH
TCGA-23-1023-01A	7.05468	HIGH
TCGA-25-1627-01A	6.9102	HIGH
TCGA-13-0797-01A	6.8395	HIGH
TCGA-04-1530-01A	6.79471	HIGH
TCGA-09-2056-01B	6.78111	HIGH
TCGA-25-2391-01A	6.74511	HIGH
TCGA-24-1417-01A	6.73287	HIGH
TCGA-23-1116-01A	6.71001	HIGH
TCGA-24-2036-01A	6.70276	HIGH
TCGA-24-1567-01A	6.67114	HIGH
TCGA-24-1427-01A	6.61013	HIGH
TCGA-24-1557-01A	6.58293	HIGH
TCGA-24-1422-01A	6.561	HIGH
TCGA-24-0966-01A	6.50903	HIGH
TCGA-29-1697-01A	6.5001	HIGH
TCGA-04-1343-01A	6.4818	HIGH
TCGA-10-0931-01A	6.38757	HIGH
TCGA-24-1850-01A	6.35465	HIGH
TCGA-24-1104-01A	6.35282	HIGH
TCGA-13-0924-01A	6.31389	HIGH
TCGA-24-1105-01A	6.30527	HIGH
TCGA-23-1113-01A	6.2131	HIGH
TCGA-24-1428-01A	6.20843	HIGH
TCGA-61-2009-01A	6.13708	HIGH
TCGA-25-2399-01A	6.12202	HIGH
TCGA-30-1861-01A	6.08628	HIGH
TCGA-09-2051-01A	6.05684	HIGH
TCGA-24-2280-01A	6.05445	HIGH
TCGA-25-2392-01A	6.05071	HIGH
TCGA-24-1928-01A	6.0288	HIGH
TCGA-25-1313-01A	6.01082	HIGH
TCGA-13-0724-01A	6.00236	HIGH
TCGA-13-0727-01A	5.95701	HIGH
TCGA-29-1784-01A	5.95483	HIGH
TCGA-24-1424-01A	5.94866	HIGH
TCGA-13-0923-01A	5.92709	HIGH
TCGA-24-1419-01A	5.85598	HIGH
TCGA-59-2352-01A	5.85165	HIGH
TCGA-61-1736-01B	5.78101	HIGH
TCGA-13-1410-01A	5.76368	HIGH
TCGA-57-1585-01A	5.72295	HIGH
TCGA-29-1691-01A	5.67276	HIGH
TCGA-09-1665-01B	5.6419	HIGH
TCGA-25-2396-01A	5.63104	HIGH
TCGA-23-1122-01A	5.61393	HIGH
TCGA-13-1403-01A	5.60956	HIGH
TCGA-57-1994-01A	5.60029	HIGH
TCGA-24-1425-01A	5.54619	LOW
TCGA-61-1900-01A	5.47771	LOW
TCGA-29-1707-02A	5.47014	LOW
TCGA-24-2267-01A	5.46947	LOW
TCGA-04-1332-01A	5.43933	LOW
TCGA-29-1696-01A	5.42398	LOW
TCGA-24-1470-01A	5.41	LOW
TCGA-59-A5PD-01A	5.37543	LOW
TCGA-29-1695-01A	5.36167	LOW
TCGA-13-0905-01B	5.32509	LOW
TCGA-31-1956-01A	5.24475	LOW
TCGA-25-1628-01A	5.21624	LOW
TCGA-61-2012-01A	5.18317	LOW
TCGA-36-1576-01A	5.15573	LOW
TCGA-24-1551-01A	5.12879	LOW
TCGA-30-1891-01A	5.12663	LOW
TCGA-13-0720-01A	5.09267	LOW
TCGA-61-2098-01A	5.08561	LOW
TCGA-24-1603-01A	5.05664	LOW
TCGA-04-1365-01A	5.04998	LOW
TCGA-24-2261-01A	5.02793	LOW
TCGA-24-0982-01A	5.0205	LOW
TCGA-29-1781-01A	5.01367	LOW
TCGA-13-0893-01B	5.01073	LOW
TCGA-25-1632-01A	4.99327	LOW
TCGA-61-1919-01A	4.95974	LOW
TCGA-24-1924-01A	4.92858	LOW
TCGA-24-1413-01A	4.84077	LOW
TCGA-09-1659-01B	4.78792	LOW
TCGA-30-1853-01A	4.76141	LOW
TCGA-13-1408-01A	4.75599	LOW
TCGA-13-0906-01A	4.74438	LOW
TCGA-61-2002-01A	4.70847	LOW
TCGA-24-1843-01A	4.70647	LOW
TCGA-30-1860-01A	4.6774	LOW
TCGA-24-1426-01A	4.62135	LOW
TCGA-25-1320-01A	4.61546	LOW
TCGA-13-A5FT-01A	4.60532	LOW
TCGA-24-1923-01A	4.58826	LOW
TCGA-10-0928-01A	4.58199	LOW
TCGA-61-1728-01A	4.58183	LOW
TCGA-61-1910-01A	4.55893	LOW
TCGA-13-0714-01A	4.52059	LOW
TCGA-24-1846-01A	4.47848	LOW
TCGA-13-1512-01A	4.42605	LOW
TCGA-24-1431-01A	4.40846	LOW
TCGA-24-1434-01A	4.3201	LOW
TCGA-13-1505-01A	4.3131	LOW
TCGA-36-1577-01A	4.28883	LOW
TCGA-20-1682-01A	4.28803	LOW
TCGA-13-0768-01A	4.2757	LOW
TCGA-29-2414-01A	4.26512	LOW
TCGA-25-1315-01A	4.24979	LOW
TCGA-10-0936-01A	4.23994	LOW
TCGA-24-2289-01A	4.21511	LOW
TCGA-23-1109-01A	4.20815	LOW
TCGA-09-1669-01A	4.19937	LOW
TCGA-31-1944-01A	4.14829	LOW
TCGA-13-1488-01A	4.1279	LOW
TCGA-13-0766-01A	4.09687	LOW
TCGA-09-1666-01A	4.08303	LOW
TCGA-61-2111-01A	4.07148	LOW
TCGA-04-1338-01A	4.03995	LOW
TCGA-61-2092-01A	4.02365	LOW
TCGA-36-1569-01A	4.0226	LOW
TCGA-24-1845-01A	4.00911	LOW
TCGA-61-1914-01A	4.0045	LOW
TCGA-13-0891-01A	3.94562	LOW
TCGA-13-2060-01A	3.93875	LOW
TCGA-29-1703-01A	3.9097	LOW
TCGA-31-1950-01A	3.86185	LOW
TCGA-23-1111-01A	3.83987	LOW
TCGA-61-2097-01A	3.83596	LOW
TCGA-23-1123-01A	3.83347	LOW
TCGA-36-1581-01A	3.77322	LOW
TCGA-24-0979-01A	3.77163	LOW
TCGA-24-1563-01A	3.74497	LOW
TCGA-24-1418-01A	3.74192	LOW
TCGA-24-2297-01A	3.7255	LOW
TCGA-04-1341-01A	3.67799	LOW
TCGA-24-2035-01A	3.64166	LOW
TCGA-13-1497-01A	3.64091	LOW
TCGA-23-1114-01B	3.63548	LOW
TCGA-13-1483-01A	3.61109	LOW
TCGA-24-2290-01A	3.56306	LOW
TCGA-29-1710-01A	3.50037	LOW
TCGA-10-0927-01A	3.48997	LOW
TCGA-23-2077-01A	3.46304	LOW
TCGA-29-1778-01A	3.45707	LOW
TCGA-24-2023-01A	3.3926	LOW
TCGA-13-1407-01A	3.37632	LOW
TCGA-24-1604-01A	3.37219	LOW
TCGA-29-1766-01A	3.36985	LOW
TCGA-13-0800-01A	3.26881	LOW
TCGA-13-1506-01A	3.26734	LOW
TCGA-20-1683-01A	3.26726	LOW
TCGA-24-1471-01A	3.25724	LOW
TCGA-WR-A838-01A	3.22175	LOW
TCGA-25-1633-01A	3.2214	LOW
TCGA-25-1634-01A	3.18821	LOW
TCGA-30-1714-01A	3.1846	LOW
TCGA-24-2288-01A	3.17389	LOW
TCGA-13-0911-01A	3.16429	LOW
TCGA-61-1721-01A	3.16194	LOW
TCGA-13-1509-01A	3.15484	LOW
TCGA-13-0804-01A	3.15455	LOW
TCGA-23-1022-01A	3.14995	LOW
TCGA-13-0730-01A	3.09715	LOW
TCGA-13-1404-01A	3.05084	LOW
TCGA-24-2020-01A	3.04549	LOW
TCGA-13-1487-01A	3.03159	LOW
TCGA-09-2044-01B	2.99038	LOW
TCGA-04-1655-01A	2.98778	LOW
TCGA-13-0900-01B	2.94471	LOW
TCGA-24-1550-01A	2.92859	LOW
TCGA-13-0888-01A	2.91676	LOW
TCGA-09-1667-01C	2.91096	LOW
TCGA-04-1356-01A	2.90809	LOW
TCGA-09-2053-01C	2.89749	LOW
TCGA-23-1028-01A	2.89255	LOW
TCGA-13-0901-01B	2.88783	LOW
TCGA-61-2000-01A	2.88714	LOW
TCGA-04-1514-01A	2.88313	LOW
TCGA-24-2033-01A	2.87543	LOW
TCGA-29-1762-01A	2.84956	LOW
TCGA-25-1312-01A	2.84694	LOW
TCGA-30-1718-01A	2.84159	LOW
TCGA-24-0968-01A	2.81487	LOW
TCGA-25-1323-01A	2.80151	LOW
TCGA-61-1738-01A	2.79088	LOW
TCGA-29-1769-01A	2.76591	LOW
TCGA-24-1464-01A	2.75208	LOW
TCGA-04-1361-01A	2.70099	LOW
TCGA-13-1495-01A	2.69062	LOW
TCGA-13-0885-01A	2.68253	LOW
TCGA-61-1741-01A	2.66274	LOW
TCGA-29-1777-01A	2.65994	LOW
TCGA-29-A5NZ-01A	2.65576	LOW
TCGA-30-1866-01A	2.64717	LOW
TCGA-29-2425-01A	2.64642	LOW
TCGA-04-1364-01A	2.63258	LOW
TCGA-13-0884-01B	2.581	LOW
TCGA-13-1477-01A	2.57211	LOW
TCGA-25-1870-01A	2.54024	LOW
TCGA-24-2026-01A	2.54001	LOW
TCGA-10-0933-01A	2.51454	LOW
TCGA-04-1347-01A	2.49354	LOW
TCGA-61-1733-01A	2.4133	LOW
TCGA-04-1542-01A	2.40797	LOW
TCGA-23-1107-01A	2.39396	LOW
TCGA-23-1110-01A	2.38155	LOW
TCGA-61-2102-01A	2.37179	LOW
TCGA-24-1469-01A	2.28769	LOW
TCGA-24-1544-01A	2.26966	LOW
TCGA-13-0920-01A	2.24065	LOW
TCGA-13-1492-01A	2.20917	LOW
TCGA-24-1474-01A	2.14543	LOW
TCGA-13-1489-01A	2.14063	LOW
TCGA-29-1763-01A	2.12354	LOW
TCGA-13-1507-01A	2.06789	LOW
TCGA-5X-AA5U-01A	2.02398	LOW
TCGA-61-1907-01A	2.01512	LOW
TCGA-13-0916-01A	1.99834	LOW
TCGA-04-1350-01A	1.99452	LOW
TCGA-13-1501-01A	1.99432	LOW
TCGA-59-2363-01A	1.96451	LOW
TCGA-29-1761-01A	1.93323	LOW
TCGA-23-1119-01A	1.91035	LOW
TCGA-25-2400-01A	1.90719	LOW
TCGA-13-1499-01A	1.86203	LOW
TCGA-25-1877-01A	1.84507	LOW
TCGA-09-0369-01A	1.78816	LOW
TCGA-13-1498-01A	1.69334	LOW
TCGA-09-2054-01A	1.68545	LOW
TCGA-25-1316-01A	1.66944	LOW
TCGA-25-2393-01A	1.6362	LOW
TCGA-09-1673-01A	1.58882	LOW
TCGA-13-1496-01A	1.56214	LOW
TCGA-09-0364-01A	1.53856	LOW
TCGA-13-0795-01A	1.53828	LOW
TCGA-20-1686-01A	1.41929	LOW
TCGA-09-1661-01B	1.3631	LOW
TCGA-29-1701-01A	1.25326	LOW
TCGA-09-2048-01A	1.18258	LOW
TCGA-29-1774-01A	0.807569	LOW
TCGA-10-0938-01A	0.704701	LOW
TCGA-13-0913-02A	0.399369	LOW

## Sheet: Supplementary Table 6
Supplementary Table 6. Primary antibodies used for Western blot and immunohistochemistry
Antibody	Company (Cat. No.)	Working dilutions
β-actin	Beijing TDY BIOTEC (TDY051C)	WB: 1:3000
β-catenin	Proteintech (51067-2-AP)	WB: 1:1000
E-cadherin	Proteintech（20874-1-AP）	WB : 1:1000
IQGAP1	Proteintech（22167-1-AP）	WB : 1:1000
N-cadherin	Proteintech（22018-1-AP）	WB : 1:3000
Rac1	Proteintech（24072-1-AP）	WB : 1:1000
TBC1D2	Novus Biologicals（NBP1-87335）	WB : 1:1000 IHC : 1:300

## Sheet: Supplementary Table 7
ID	Age	FIGO Stage	Grade	Histological type	Metastasis	Status	Time(months)	NACT	Group(cut off:TBC1D2 median)	IHC score of TBC1D2 in tumor	IHC score of TBC1D2 in peritumor
1	62	IV	G3	Serous Cystadenocarcinoma	1	1	17	NO	High	10.4	7.2
2	56	IIA	G1	Serous Cystadenocarcinoma	0	0	31	NO	High	9	2.8
3	55	IIA	G1	Serous Cystadenocarcinoma	0	0	45	NO	Low	6.4	2
4	55	IIC	G2	Serous Cystadenocarcinoma	0	0	67	NO	Low	6.4	4.2
5	35	IIA	G1	Endometrioid tumor	0	0	77	NO	Low	3	1.6
6	78	IIB	G2	Serous Cystadenocarcinoma	0	1	55	NO	High	8.4	7.2
7	72	IV	G3	Serous Cystadenocarcinoma	1	1	17	NO	High	10.8	7.4
8	58	IIC	G2	Endometrioid tumor	0	0	12	NO	Low	6.8	2.8
9	56	IIIC	G3	Serous Cystadenocarcinoma	1	0	69	NO	High	10.8	2.2
10	65	IIIC	G3	Serous Cystadenocarcinoma	1	1	28	NO	High	10	7.2
11	54	IIC	G2	Serous Cystadenocarcinoma	0	0	71	NO	Low	6.8	6.4
12	70	IIB	G1	Serous Cystadenocarcinoma	0	0	13	NO	Low	7.2	5.2
13	58	IIB	G2	Serous Cystadenocarcinoma	0	0	55	NO	High	9.6	6.8
14	57	IIA	G1	Mucinous Cystadenocarcinoma	0	0	31	NO	High	9.6	1
15	78	IIIB	G2	Serous Cystadenocarcinoma	1	1	46	NO	High	11.4	7
16	53	IIC	G2	Serous Cystadenocarcinoma	0	0	67	NO	Low	7.8	3.6
17	63	IIIA	G2	Serous Cystadenocarcinoma	1	0	51	NO	Low	7.8	3.6
18	78	IV	G3	Serous Cystadenocarcinoma	1	1	22	NO	High	10.4	2.6
19	72	IV	G3	Serous Cystadenocarcinoma	1	1	24	NO	Low	6	1.4
20	79	IIIA	G3	Serous Cystadenocarcinoma	1	1	67	NO	High	11.4	1.8
21	65	IIA	G2	Serous Cystadenocarcinoma	0	0	15	NO	Low	7.2	1.6
22	46	IIA	G1	Serous Cystadenocarcinoma	0	0	15	NO	Low	3	1.4
23	47	IIA	G1	Endometrioid tumor	0	0	15	NO	Low	2.6	1.4
24	54	IIC	G2	Serous Cystadenocarcinoma	0	0	27	NO	Low	4.8	1.6
25	59	IV	G3	Serous Cystadenocarcinoma	1	1	28	NO	High	10	7.6
26	58	IIIC	G3	Serous Cystadenocarcinoma	1	1	55	NO	High	12	1.8
27	52	IIA	G1	Serous Cystadenocarcinoma	0	0	62	NO	Low	2.8	2.8
28	65	IIIA	G2	Serous Cystadenocarcinoma	1	0	28	NO	Low	3.6	2.8
29	65	IIIA	G2	Serous Cystadenocarcinoma	1	0	28	NO	Low	3.4	3.6
30	45	IIA	G1	Serous Cystadenocarcinoma	0	0	42	NO	Low	2.4	1.4
31	56	IIA	G2	Serous Cystadenocarcinoma	0	1	34	NO	High	8.6	3.8
32	60	IIIC	G3	Endometrioid tumor	1	0	68	NO	Low	8	3.2
33	70	IV	G3	Serous Cystadenocarcinoma	1	1	18	NO	High	11.4	6.4
34	74	IV	G3	Serous Cystadenocarcinoma	1	1	28	NO	High	10.6	6.4
35	62	IIIC	G3	Serous Cystadenocarcinoma	1	1	28	NO	High	10.4	8.4
36	67	IIIC	G3	Serous Cystadenocarcinoma	1	1	61	NO	Low	10.4	3.6
37	60	IIB	G2	Endometrioid tumor	0	0	13	NO	Low	8	6.8
38	67	IIIA	G2	Clear cell carcinoma	1	0	51	NO	High	10.6	3.4
39	58	IV	G3	Serous Cystadenocarcinoma	1	1	55	NO	High	10.8	2.4
40	65	IIIC	G3	Serous Cystadenocarcinoma	1	1	58	NO	High	8.4	3.8
41	68	IIIA	G2	Serous Cystadenocarcinoma	1	0	51	NO	High	8.4	2
42	52	IIC	G1	Clear cell carcinoma	0	0	62	NO	Low	2.4	3.2
43	55	IIB	G2	Serous Cystadenocarcinoma	0	1	34	NO	High	10.8	3.2
44	66	IV	G3	Serous Cystadenocarcinoma	1	1	61	NO	Low	7.6	2.6
45	54	IIA	G1	Serous Cystadenocarcinoma	0	0	45	NO	High	8.4	0
46	58	IIIA	G3	Serous Cystadenocarcinoma	1	1	68	NO	Low	7.6	2.4
47	64	IIIC	G3	Serous Cystadenocarcinoma	1	0	57	NO	High	10.2	5.2
48	47	IIA	G1	Serous Cystadenocarcinoma	0	0	41	NO	Low	2.2	2.6
49	46	IIA	G1	Serous Cystadenocarcinoma	0	0	15	NO	Low	2.2	2.8
50	61	IIIC	G3	Serous Cystadenocarcinoma	1	0	17	NO	High	9.6	6.4
51	60	IIIA	G2	Serous Cystadenocarcinoma	1	1	37	NO	Low	3.2	1
52	55	IIIC	G3	Serous Cystadenocarcinoma	1	1	55	NO	High	9.6	3.2
53	59	IIA	G1	Serous Cystadenocarcinoma	0	0	31	NO	High	9.4	2.4
54	53	IIB	G2	Endometrioid tumor	0	0	54	NO	Low	8.2	6
55	48	IIC	G2	Serous Cystadenocarcinoma	0	0	27	NO	Low	6	2.8
56	62	IIIC	G3	Serous Cystadenocarcinoma	1	1	25	NO	High	9.6	3.2
57	80	IV	G3	Serous Cystadenocarcinoma	1	1	24	NO	High	8.6	2.6
58	61	IIIA	G2	Endometrioid tumor	1	1	37	NO	High	8.6	1.6
59	78	IIIA	G3	Serous Cystadenocarcinoma	1	1	69	NO	Low	7.2	2.6
60	82	IV	G3	Mucinous Cystadenocarcinoma	1	1	24	NO	Low	6.4	2
61	63	IIIB	G3	Serous Cystadenocarcinoma	1	1	28	NO	High	10.6	10.2
62	67	IIIC	G3	Serous Cystadenocarcinoma	1	0	49	NO	High	11.4	3.2
63	56	IIIC	G3	Serous Cystadenocarcinoma	1	1	28	NO	High	10.6	6.4
64	70	IIIC	G2	Endometrioid tumor	1	0	68	NO	High	8.6	2.6
65	70	IV	G3	Serous Cystadenocarcinoma	1	1	22	NO	High	10.8	3
66	65	IIB	G2	Serous Cystadenocarcinoma	0	0	14	NO	Low	7.6	1.8
67	67	IIIC	G3	Serous Cystadenocarcinoma	1	0	58	NO	High	11.4	1.8
68	70	IV	G3	Clear cell carcinoma	1	1	28	NO	High	10.8	7.2
69	57	IIIA	G2	Serous Cystadenocarcinoma	1	1	37	NO	Low	3.6	1.4
70	56	IIA	G1	Endometrioid tumor	0	0	64	NO	Low	3.6	3.2
71	55	IIA	G1	Serous Cystadenocarcinoma	0	0	41	NO	Low	3.2	1.6
72	61	IV	G3	Serous Cystadenocarcinoma	1	1	28	NO	High	10.2	6.8
73	55	IV	G3	Mucinous Cystadenocarcinoma	1	1	28	NO	High	10.8	3.6
74	72	IIC	G2	Serous Cystadenocarcinoma	0	0	68	NO	Low	6.4	1.4
75	68	IIIC	G3	Serous Cystadenocarcinoma	1	1	25	NO	High	8.8	3.4
76	75	IV	G3	Mucinous Cystadenocarcinoma	1	0	48	NO	High	10	7.8
77	73	IV	G3	Serous Cystadenocarcinoma	1	1	22	NO	High	10.6	3.4
78	65	IIIC	G3	Clear cell carcinoma	1	0	16	NO	High	10	3.2
79	68	IIC	G2	Serous Cystadenocarcinoma	0	0	106	NO	Low	7.6	4.8
80	66	IIIC	G3	Serous Cystadenocarcinoma	1	1	61	NO	Low	6.8	3
81	63	IIC	G2	Mucinous Cystadenocarcinoma	0	0	27	NO	Low	6.2	2.2
82	70	IV	G3	Serous Cystadenocarcinoma	1	1	28	NO	High	10.8	7.2
83	64	IIIB	G2	Serous Cystadenocarcinoma	1	1	45	NO	High	10.8	10.4
84	72	IIIC	G3	Clear cell carcinoma	1	0	17	NO	High	12	4.8
85	65	IIIA	G2	Serous Cystadenocarcinoma	1	0	52	NO	Low	7.8	3.6
86	55	IIA	G1	Serous Cystadenocarcinoma	0	0	62	NO	Low	3.6	1.2
87	47	IIB	G1	Serous Cystadenocarcinoma	0	0	15	NO	Low	2.2	1
88	55	IIIB	G2	Mucinous Cystadenocarcinoma	1	0	52	NO	Low	2.4	3.8
89	45	IIC	G2	Endometrioid tumor	0	0	104	NO	Low	6.4	6.6
90	59	IIIA	G3	Clear cell carcinoma	1	1	38	NO	Low	1.2	1.6
91	68	IIA	G2	Serous Cystadenocarcinoma	0	1	34	NO	High	8.6	3
92	62	IIIC	G3	Serous Cystadenocarcinoma	1	0	45	NO	High	12	7
93	78	IIIA	G3	Serous Cystadenocarcinoma	1	1	67	NO	Low	7.2	2.2
94	62	IIA	G2	Clear cell carcinoma	0	0	15	NO	Low	6.4	2.2
95	49	IIC	G2	Clear cell carcinoma	0	0	71	NO	Low	6.4	3.6
96	67	IV	G3	Mucinous Cystadenocarcinoma	1	1	24	NO	Low	4.8	1.4
97	53	IIC	G2	Clear cell carcinoma	0	0	27	NO	Low	5.8	1.8
98	52	IIIA	G2	Serous Cystadenocarcinoma	1	0	13	NO	Low	7.6	8.6
99	60	IIA	G1	Endometrioid tumor	0	0	45	NO	Low	5.6	2.4
100	66	IIIC	G3	Serous Cystadenocarcinoma	1	0	48	NO	High	9.8	6.4
